# Supplementary material
Source: MDPI journal article supplement (https://www.mdpi.com/2073-4441/15/2/239)
Supplement: s1 [file s1]

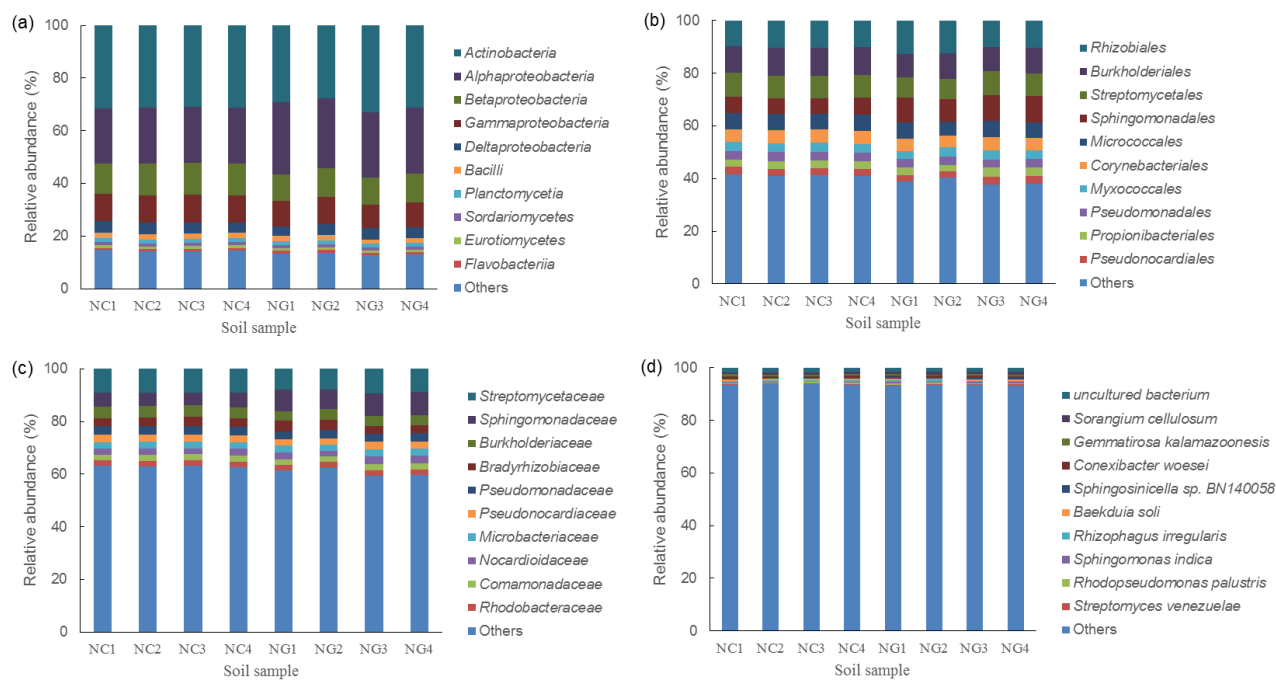

**Figure S1.** The relative abundances of microorganisms at class (a), order (b), Family (c) and species (d) in rhizosphere (NG) and non-rhizosphere (NC) soil.

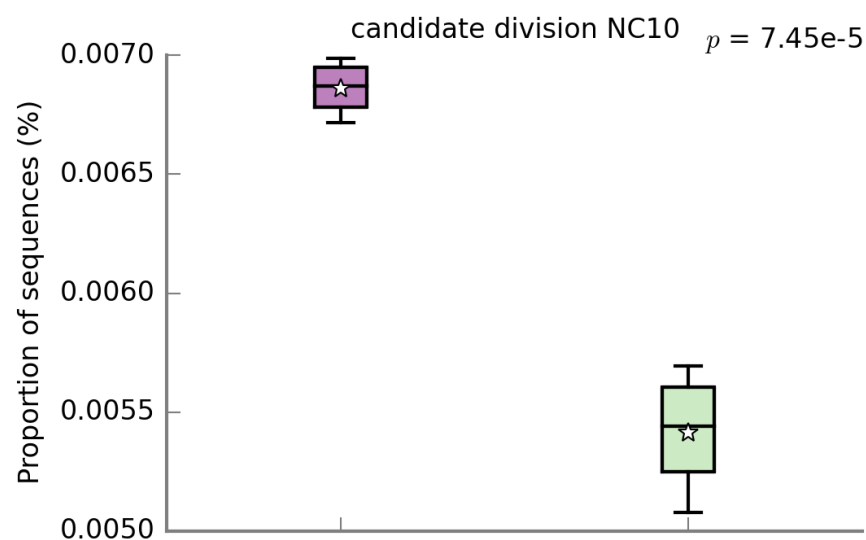

**Figure S2.** Scale plot of the characteristic sequence of *Candidate division* NC10.
